# Supplementary material for: Rejuvenating aged microglia by p16ink4a-siRNA-loaded nanoparticles increases amyloid-β clearance in animal models of Alzheimer’s disease
Source: PubMed Central journal article supplement (PMC10943801; doi:10.1186/s13024-024-00715-x), 2024-03-16
Supplement: 13024_2024_715_MOESM8_ESM.pdf [file 13024_2024_715_MOESM8_ESM.pdf]

| Figure number | Test                     | Technic              | Treatment                                             | Genotype                                                                                                                                                                | Sex   | Age   | Number               | Mean                                                              | SEM(±)               | Statistical test          | Stat                                                  | P value         | post hoc test                 | Comparison                                          | t | P value                                             |
|---------------|--------------------------|----------------------|-------------------------------------------------------|-------------------------------------------------------------------------------------------------------------------------------------------------------------------------|-------|-------|----------------------|-------------------------------------------------------------------|----------------------|---------------------------|-------------------------------------------------------|-----------------|-------------------------------|-----------------------------------------------------|---|-----------------------------------------------------|
| 1C            | co-localization test     | Immunohistochemistry | co-local area with Aβ                                 | 5XFAD                                                                                                                                                                   | M     | 8-9m  | 10 (for each groups) | -3.188                                                            | 0.3148               | unpaired t-test           |                                                       | <0.0001         |                               |                                                     |   |                                                     |
| 1F            | cell volume analysis     | Immunohistochemistry | PyrPeg in cell unit                                   | 5XFAD                                                                                                                                                                   | M     | 8-9m  | 10 (for each groups) | -297                                                              | 30.91                | unpaired t-test           |                                                       | <0.0001         |                               |                                                     |   |                                                     |
| 2E            | expression density       | Immunohistochemistry | p16 <sup>ink4a</sup> expression                       | 5ZXFAD / age matched littermate control                                                                                                                                 | M     | 8-9m  | 10 (for each groups) | 3.614                                                             | 0.8285               | unpaired t-test           |                                                       | 0.0005          |                               |                                                     |   |                                                     |
| 2H            | cell unit analysis       | Immunohistochemistry | p16 <sup>ink4a</sup> expression with Iba1 or GFAP     | 5ZXFAD / age matched littermate control                                                                                                                                 | M     | 8-9m  | 10 (for each groups) | 37.08                                                             | 2.845                | unpaired t-test           |                                                       | <0.0001         |                               |                                                     |   |                                                     |
| 3A            | expression density       | western blot         | p16 <sup>ink4a</sup>                                  | BV2 cell                                                                                                                                                                |       |       |                      | -1.5667                                                           | 0.2963               | unpaired t-test           |                                                       | 0.0061          |                               |                                                     |   |                                                     |
| 3B            | expression density       | qRT-PCR              | p16 <sup>ink4a</sup>                                  | BV2 cell                                                                                                                                                                |       |       |                      | -0.8275                                                           | 0.1126               | unpaired t-test           |                                                       | 0.0003          |                               |                                                     |   |                                                     |
| 3F            | cell viability test      | MTT assay            | p16 <sup>ink4a</sup> PLGA NPs                         | BV2 cell                                                                                                                                                                |       |       |                      |                                                                   |                      | Two-way ANOVA             | F(3, 15) = 2.083                                      | 0.6126          | Bonferroni's test             |                                                     |   |                                                     |
| 3J            | cell unit analysis       | Immunohistochemistry | AAV-GFP NPs                                           | WT                                                                                                                                                                      | M     | 7w-8w | 10 (for each groups) |                                                                   |                      | one-way ANOVA             |                                                       | 0.0115          | tukey test                    | GFAP vs Iba1<br>GFAP vs NeuN<br>Iba1 vs NeuN        |   | <0.0001<br>0.0046<br><0.0001                        |
| 4B            | distance/velocity        | behavior test        | p16 <sup>ink4a</sup> PLGA NPs/scramble siRNA PLGA NPs | 5XFAD                                                                                                                                                                   | M     | 8-9m  | 7 (for each groups)  |                                                                   |                      | Two-way ANOVA             | F(2, 39) = 0.07171                                    | 0.9309          | Bonferroni's test             | trial 1<br>trial 2<br>trial 3                       |   | 0.4284<br>0.7481<br>0.5151                          |
| 4E            | time to target           | behavior test        | p16 <sup>ink4a</sup> PLGA NPs/scramble siRNA PLGA NPs | 5XFAD                                                                                                                                                                   | M     | 8-9m  | 8 (for each groups)  |                                                                   |                      | Two-way ANOVA             | F(4, 56) = 13.74                                      | <0.0001         | Bonferroni's test             | Trial 1<br>Trial 2<br>Trial 3<br>Trial 4<br>Trial 5 |   | >0.9999<br><0.0001<br><0.0001<br><0.0001<br><0.0001 |
| 4G            | cell area analysis       | Immunohistochemistry | Abeta                                                 | p16 <sup>ink4a</sup> PLGA NPs/scramble siRNA PLGA NPs                                                                                                                   | 5XFAD | M     | 8-9m                 | 7 (for each groups)                                               |                      | one-way ANOVA             | F(3, 24) = 63.49                                      | <0.0001         | tukey test                    | Cortex<br>hippocampus                               |   | <0.0001<br><0.0001                                  |
| 4H            | cell surface area        | Immunohistochemistry | Iba1                                                  | p16 <sup>ink4a</sup> PLGA NPs/scramble siRNA PLGA NPs                                                                                                                   | 5XFAD | M     | 8-9m                 | 10 (for each groups)                                              | -1.78                | 0.1952                    | unpaired t-test                                       |                 | <0.0001                       |                                                     |   |                                                     |
|               | plaque-close cell number | Immunohistochemistry | Iba1                                                  | p16 <sup>ink4a</sup> PLGA NPs/scramble siRNA PLGA NPs                                                                                                                   | 5XFAD | M     | 8-9m                 | 10 (for each groups)                                              | -1.75                | 0.1561                    | unpaired t-test                                       |                 | <0.0001                       |                                                     |   |                                                     |
| 4I            | Abeta amount             | ELISA                | Abeta                                                 | p16 <sup>ink4a</sup> PLGA NPs/scramble siRNA PLGA NPs                                                                                                                   | 5XFAD | M     | 8-9m                 | 8 (for each groups)                                               | -37.57               | 2.415                     | unpaired t-test                                       |                 | <0.0001                       |                                                     |   |                                                     |
| 4J            | expression density       | western blot         | p-Rb/Rb,<br>Cyclin D1<br>Cyclin B1                    | p16 <sup>ink4a</sup> PLGA NPs/scramble siRNA PLGA NPs<br>p16 <sup>ink4a</sup> PLGA NPs/scramble siRNA PLGA NPs<br>p16 <sup>ink4a</sup> PLGA NPs/scramble siRNA PLGA NPs | 5XFAD | M     | 8-9m                 | 9 (for each groups)<br>9 (for each groups)<br>9 (for each groups) | 1.56<br>0.54<br>0.55 | 0.1939<br>0.088<br>0.1286 | unpaired t-test<br>unpaired t-test<br>unpaired t-test |                 | <0.0001<br><0.0001<br><0.0001 |                                                     |   |                                                     |
| 5B            | staining density         | SA-beta-gal assay    | colocal correlation                                   | p16 <sup>ink4a</sup> PLGA NPs/scramble siRNA PLGA NPs                                                                                                                   | 5XFAD | M     | 8-9m                 | 6 (for each groups)                                               | -0.1159              | 0.02198                   | unpaired t-test                                       |                 | <0.0001                       |                                                     |   |                                                     |
| 5C            | colocalization           | SA-beta-gal assay    | colocalization                                        | p16 <sup>ink4a</sup> PLGA NPs/scramble siRNA PLGA NPs                                                                                                                   | 5XFAD | M     | 8-9m                 | 6 (for each groups)                                               | -3.792               | 0.4752                    | unpaired t-test                                       |                 | <0.0001                       |                                                     |   |                                                     |
| 5D            | expression fold          |                      | mRNA                                                  | p16 <sup>ink4a</sup> PLGA NPs/scramble siRNA PLGA NPs                                                                                                                   | 5XFAD | M     | 8-9m                 | 6 (for each groups)                                               |                      |                           | Two-way ANOVA                                         | F(10,110)=52.39 | <0.0001                       | Tukey test                                          |   | <0.0001                                             |
|               |                          |                      |                                                       |                                                                                                                                                                         |       |       |                      |                                                                   |                      |                           |                                                       |                 |                               |                                                     |   |                                                     |

Figure

|    |                       |                      |                               |                               |          |   |      |        |        |         |                 |                  |         |                   |         |  |         |
|----|-----------------------|----------------------|-------------------------------|-------------------------------|----------|---|------|--------|--------|---------|-----------------|------------------|---------|-------------------|---------|--|---------|
|    |                       | Timp1                |                               |                               |          |   |      |        |        |         |                 |                  |         |                   |         |  |         |
| 5E | cell number counting  | Immunohistochemistry | ki67                          | p16ink4a PLGA                 | 5XFAD    | M | 8-9m | 9 (for | 1.911  | 0.1495  | unpaired t-test |                  | <0.0001 |                   |         |  |         |
| 5F | cell number counting  | Immunohistochemistry | Lamp1                         | p16ink4a PLGA                 | 5XFAD    | M | 8-9m | 9 (for | 1.956  | 0.136   | unpaired t-test |                  | <0.0001 |                   |         |  |         |
| 5I | cell number counting  | Immunohistochemistry | TREM2                         | p16ink4a PLGA                 | 5XFAD    | M | 8-9m | 9 (for | 1.978  | 0.1223  | unpaired t-test |                  | <0.0001 |                   |         |  |         |
| 5J | cell number counting  | Immunohistochemistry | clec7a                        | p16ink4a PLGA                 | 5XFAD    | M | 8-9m | 9 (for | 1.733  | 0.1577  | unpaired t-test |                  | <0.0001 |                   |         |  |         |
| 6B | phagocytosis analysis | Immunohistochemistry | phagosome number              | p16ink4a siRNA/scramble siRNA | BV2 cell |   |      |        |        |         | Two-way ANOVA   | F(2, 18) = 53.24 | <0.0001 | tukey test        | <5      |  | <0.0001 |
| 6E | Density               | FACS                 | phagosome density             | p16ink4a siRNA/scramble siRNA | BV2 cell |   |      |        |        |         | Two-way ANOVA   | F(4, 20) = 37.36 | <0.0001 | tukey test        | 2 hours |  | <0.0001 |
|    |                       |                      |                               |                               |          |   |      |        |        |         |                 |                  |         |                   | 1 day   |  | <0.0001 |
| 6J | cell unnumber (%)     | FACS                 | G2/M, S, G0/G1                | p16ink4a siRNA/scramble siRNA | BV2 cell |   |      |        |        |         | Two-way ANOVA   | F(2, 18) = 6.256 | 0.0087  | Bonferroni's test | G0/G1   |  | 0.0432  |
| 6L | expression density    | western blot         | p-Rb/Rb, Cyclin D1, Cyclin B1 | p16ink4a siRNA/scramble siRNA | BV2 cell |   |      |        | 1.92   | 0.2074  | unpaired t-test |                  | <0.0001 |                   |         |  |         |
|    |                       |                      |                               |                               |          |   |      |        | -0.728 | -0.1338 |                 |                  | 0.0006  |                   |         |  |         |
|    |                       |                      |                               |                               |          |   |      |        | -0.672 | 0.1255  |                 |                  | 0.0007  |                   |         |  |         |

|        | Figure number | Test                       | Technic                           | Treatment                      | Genotype                                              | Sex          | Age                  | Number                     | Mean    | SEM(±)  | Statistical test | Stat               | P value | post hoc test | Comparison                       | t               | P value |         |  |
|--------|---------------|----------------------------|-----------------------------------|--------------------------------|-------------------------------------------------------|--------------|----------------------|----------------------------|---------|---------|------------------|--------------------|---------|---------------|----------------------------------|-----------------|---------|---------|--|
| Supple | 1E            | expression density         | western blot                      | GFAP                           | 5XFAD_WT                                              | M            | 8-9m                 | 6                          | 0.6625  | 0.2239  | unpaired t-test  |                    | 0.0253  |               |                                  |                 |         |         |  |
|        |               |                            |                                   | Ab                             | 5XFAD_WT                                              | M            | 8-9m                 | 6                          | 1.033   | 0.3061  | unpaired t-test  |                    | 0.0331  |               |                                  |                 |         |         |  |
|        |               |                            |                                   | NeuN                           | 5XFAD_WT                                              | M            | 8-9m                 | 6                          | -0.4725 | 0.02869 | unpaired t-test  |                    | 0.0022  |               |                                  |                 |         |         |  |
|        |               |                            |                                   | Iba1                           | 5XFAD_WT                                              | M            | 8-9m                 | 6                          | 0.94    | 0.2767  | unpaired t-test  |                    | 0.0146  |               |                                  |                 |         |         |  |
|        | 3             | log2(CDKN2A TPM+1)         | GTEx (genotype-tissue expression) | Amygdala                       |                                                       |              |                      |                            | 152     |         |                  | Kruska-wallis test |         |               | Dunn's multiple comparisons test | 20-29 vs all    |         | n.s.    |  |
|        |               |                            |                                   | Anterior cingulate cortex      |                                                       |              |                      | 176                        |         |         | 20-29 vs 30-39   |                    |         | 0.05          |                                  |                 |         |         |  |
|        |               |                            |                                   | caudate basal ganglia          |                                                       |              |                      | 246                        |         |         | 20-29 vs all     |                    |         | n.s.          |                                  |                 |         |         |  |
|        |               |                            |                                   | cerebellum                     |                                                       |              |                      | 241                        |         |         | 20-29 vs all     |                    |         | n.s.          |                                  |                 |         |         |  |
|        |               |                            |                                   | cortex                         |                                                       |              |                      | 255                        |         |         | 20-29 vs 60-69   |                    |         | 0.0028        |                                  |                 |         |         |  |
|        |               |                            |                                   | frontal cortex BA9             |                                                       |              |                      | 209                        |         |         | 20-29 vs 70-79   |                    |         | 0.0075        |                                  |                 |         |         |  |
|        |               |                            |                                   | hippocampus                    |                                                       |              |                      | 197                        |         |         | 20-29 vs 60-69   |                    |         | 0.034         |                                  |                 |         |         |  |
|        |               |                            |                                   | hypothalamus                   |                                                       |              |                      | 202                        |         |         | 20-29 vs 60-69   |                    |         | 0.0148        |                                  |                 |         |         |  |
|        |               |                            |                                   | nucleus aaumbens basal ganglia |                                                       |              |                      | 246                        |         |         | 20-29 vs 70-79   |                    |         | 0.0157        |                                  |                 |         |         |  |
|        |               |                            |                                   | putamen basal ganglia          |                                                       |              |                      | 205                        |         |         | 20-29 vs all     |                    |         | n.s.          |                                  |                 |         |         |  |
|        |               |                            |                                   | spinal cord cervical C1        |                                                       |              |                      | 159                        |         |         | 20-29 vs all     |                    |         | n.s.          |                                  |                 |         |         |  |
|        |               |                            |                                   | substantial nigra              |                                                       |              |                      | 139                        |         |         | 20-29 vs all     |                    |         | n.s.          |                                  |                 |         |         |  |
|        |               |                            |                                   | 4D                             | expression density                                    | western blot | p16 <sup>ink4a</sup> | AD patient/healthy control | F/M     |         | 5                |                    | 1.376   | 0.3067        |                                  | unpaired t-test |         | 0.002   |  |
|        | Ab            | AD patient/healthy control | F/M                               |                                |                                                       |              |                      | 5                          | 1.336   | 0.3595  | unpaired t-test  |                    | 0.0059  |               |                                  |                 |         |         |  |
|        | Iba1          | AD patient/healthy control | F/M                               |                                |                                                       |              |                      | 5                          | 0.322   | 0.0823  | unpaired t-test  |                    | 0.0045  |               |                                  |                 |         |         |  |
|        | 5A            | expression                 | qRT-PCT                           | p16 <sup>ink4a</sup>           | p16 <sup>ink4a</sup> PLGA NPs/scramble siRNA PLGA NPs | 5XFAD TG     | M                    | 8-9m                       | 6       | -0.5667 | 0.09006          | unpaired t-test    |         |               |                                  |                 |         | <0.0001 |  |
|        | 5C            | expression density         | western blot                      | p16 <sup>ink4a</sup>           | p16 <sup>ink4a</sup> PLGA NPs/scramble siRNA PLGA NPs | 5XFAD TG     | M                    | 8-9m                       | 6       | -3      | 0.2908           | unpaired t-test    |         |               |                                  |                 |         | <0.0001 |  |
|        | 5E            | expression density         | Immunohistochemistry              | p16 <sup>ink4a</sup>           | p16 <sup>ink4a</sup> PLGA NPs/scramble siRNA PLGA NPs | 5XFAD TG     | M                    | 8-9m                       | 10      | -0.88   | 0.08943          | unpaired t-test    |         |               |                                  |                 |         | <0.0001 |  |
