# Supplementary material for: Rejuvenating aged microglia by p16ink4a-siRNA-loaded nanoparticles increases amyloid-β clearance in animal models of Alzheimer’s disease
Source: PubMed Central journal article supplement (PMC10943801; doi:10.1186/s13024-024-00715-x), 2024-03-16
Supplement: 13024_2024_715_MOESM9_ESM.pdf [file 13024_2024_715_MOESM9_ESM.pdf]

| <b>Up-regulation</b>                                           | <b>Fold Enrichment</b> | <b>(-)LOG10(FDR)</b> |
|----------------------------------------------------------------|------------------------|----------------------|
| <b>GO biological process complete</b>                          |                        |                      |
| mitotic cell cycle (GO:0000278)                                | <b>6.82</b>            | <b>25.10</b>         |
| mitotic cell cycle process (GO:1903047)                        | <b>7.18</b>            | <b>23.85</b>         |
| cell cycle (GO:0007049)                                        | <b>4.26</b>            | <b>23.28</b>         |
| cell cycle process (GO:0022402)                                | <b>5.16</b>            | <b>21.11</b>         |
| cell division (GO:0051301)                                     | <b>6.05</b>            | <b>17.73</b>         |
| <b>GO cellular component complete</b>                          |                        |                      |
| non-membrane-bounded organelle (GO:0043228)                    | <b>2.08</b>            | <b>16.01</b>         |
| intracellular non-membrane-bounded organelle (GO:0043232)      | <b>2.08</b>            | <b>15.71</b>         |
| intracellular anatomical structure (GO:0005622)                | <b>1.31</b>            | <b>12.72</b>         |
| chromosome (GO:0005694)                                        | <b>3.15</b>            | <b>11.64</b>         |
| intracellular organelle (GO:0043229)                           | <b>1.35</b>            | <b>11.62</b>         |
| <b>GO molecular function complete</b>                          |                        |                      |
| microtubule binding (GO:0008017)                               | <b>5.75</b>            | <b>6.87</b>          |
| tubulin binding (GO:0015631)                                   | <b>4.37</b>            | <b>5.58</b>          |
| adenyl nucleotide binding (GO:0030554)                         | <b>2.36</b>            | <b>5.06</b>          |
| ATP binding (GO:0005524)                                       | <b>2.41</b>            | <b>5.04</b>          |
| adenyl ribonucleotide binding (GO:0032559)                     | <b>2.38</b>            | <b>5.04</b>          |
| <b>Down-regulation</b>                                         | <b>Fold Enrichment</b> | <b>(-)LOG10(FDR)</b> |
| <b>GO biological process complete</b>                          |                        |                      |
| regulation of nitrogen compound metabolic process (GO:0051171) | <b>1.76</b>            | <b>9.28</b>          |
| negative regulation of biological process (GO:0048519)         | <b>1.77</b>            | <b>9.22</b>          |
| negative regulation of cellular process (GO:0048523)           | <b>1.83</b>            | <b>9.07</b>          |
| regulation of primary metabolic process (GO:0080090)           | <b>1.72</b>            | <b>8.92</b>          |
| regulation of cellular metabolic process (GO:0031323)          | <b>1.69</b>            | <b>8.42</b>          |
| <b>GO cellular component complete</b>                          |                        |                      |
| intracellular organelle (GO:0043229)                           | <b>1.28</b>            | <b>5.70</b>          |
| nucleus (GO:0005634)                                           | <b>1.48</b>            | <b>5.68</b>          |
| intracellular anatomical structure (GO:0005622)                | <b>1.23</b>            | <b>5.64</b>          |
| organelle (GO:0043226)                                         | <b>1.27</b>            | <b>5.45</b>          |
| RNA polymerase II transcription regulator complex (GO:0090575) | <b>4.92</b>            | <b>4.64</b>          |
| <b>GO molecular function complete</b>                          |                        |                      |
| protein binding (GO:0005515)                                   | <b>1.39</b>            | <b>5.22</b>          |
| transcription factor binding (GO:0008134)                      | <b>2.89</b>            | <b>2.99</b>          |
| binding (GO:0005488)                                           | <b>1.2</b>             | <b>2.83</b>          |
| enzyme binding (GO:0019899)                                    | <b>1.83</b>            | <b>2.64</b>          |
| organic cyclic compound binding (GO:0097159)                   | <b>1.48</b>            | <b>2.64</b>          |
